# Supplementary material
Source: PubMed Central journal article supplement (PMC2782666)
Supplement: NIHMS84560-supplement-01.pdf [file NIHMS84560-supplement-01.pdf]

## Supplemental Data

### Combinatorial Regulation of Endothelial Gene Expression by Ets and Forkhead

#### Transcription Factors

Sarah De Val, Neil C. Chi, Stryder M. Meadows, Simon Minovitsky, Joshua P. Anderson, Ian S. Harris, Melissa L. Ehlers, Pooja Agarwal, Axel Visel, Shan-Mei Xu, Len A. Pennacchio, Inna Dubchak, Paul A. Krieg, Didier Y.R. Stainier, and Brian L. Black

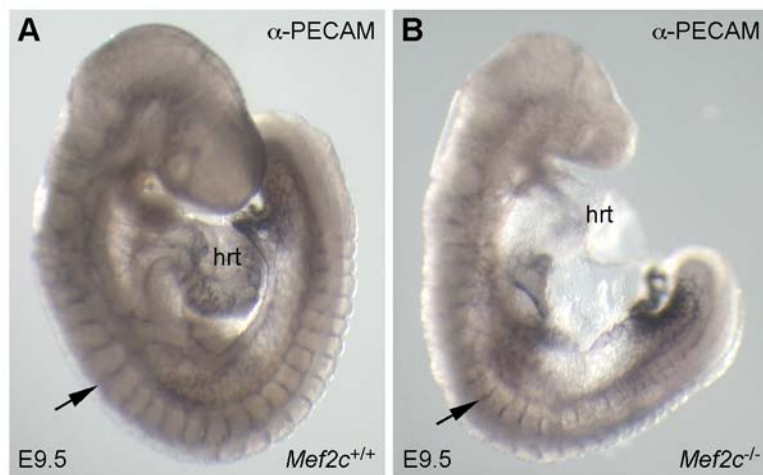

Figure S1. *Mef2c*-null embryos display aberrant vascular development. (A) *Mef2c*<sup>+/+</sup> and (B) *Mef2c*<sup>-/-</sup> embryos were collected at 9.5 days post-coitum, fixed in 4% paraformaldehyde overnight, and stained with anti-PECAM antibody as previously described (De Val *et al.*, *Dev Biol.* 275, 2004). Consistent with previous reports (Lin *et al.*, *Development* 125, 1998), PECAM staining was detected in the *Mef2c* null embryo but was less extensive than in the wild-type control, indicating that vascular development was defective, but not abolished, in the absence of MEF2C. Arrows mark PECAM expression in intersomitic vessels. hrt, heart.

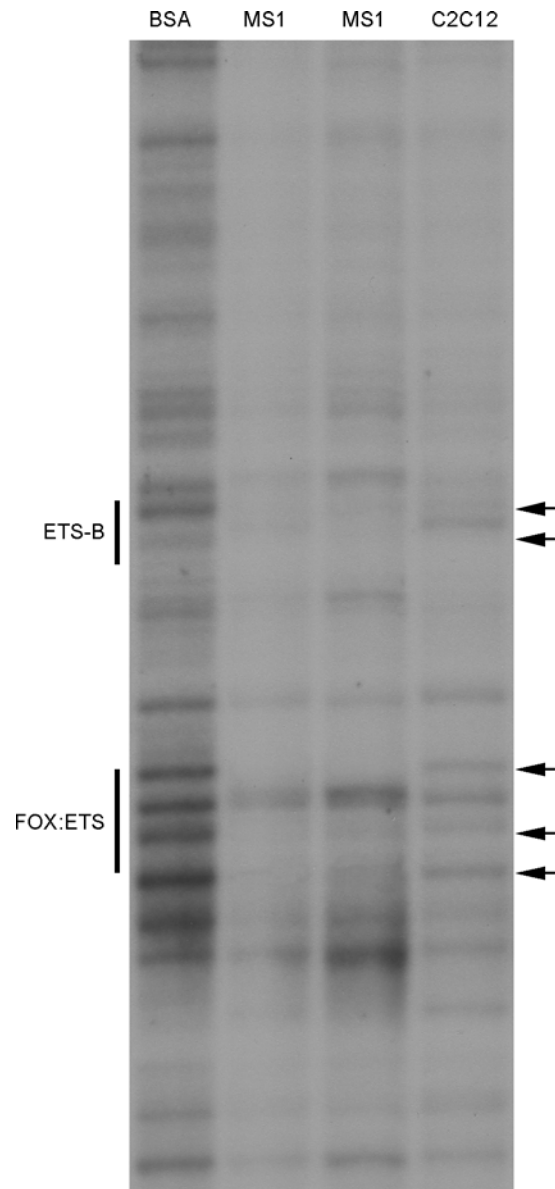

Figure S2. DNase I footprinting analysis identified regions of *Mef2c* F10-44 protected by binding activities present in extracts of the MS-1 endothelial cell line but not in extracts from the C2C12 myoblast cell line. The two protected regions correspond to the FOX:ETS motif and ETS-B site within *Mef2c* F10-44. Arrows indicate regions of protection, which can be seen as the loss of cleaved bands in the presence of MS-1 cell extract compared to BSA or C2C12 cell extracts. DNase I footprinting was performed as described by Kucharczuk and Goldhamer, *Methods in Cell Biology* 52, 1997. The F10-44 probe was labeled by filling in recessed 3' ends with Klenow fragment and radiolabeled dCTP. Probes were purified using micro bio-spin P-30 Tris chromatography columns (BioRad). Cell extracts were prepared as described by Francis *et al.*, *Mol Endocrinol.* 20, 2006.

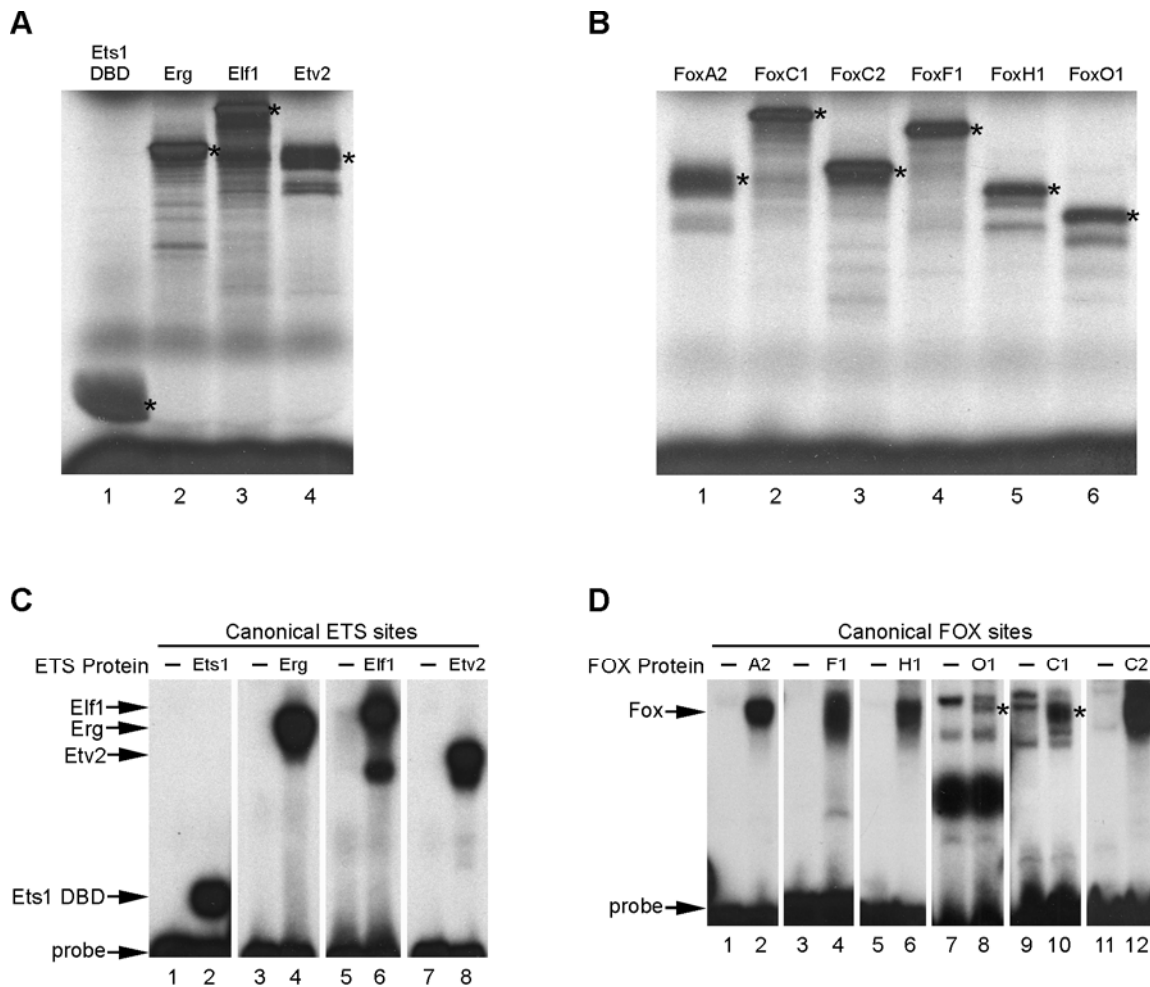

Figure S3. Ets and Forkhead proteins used in these studies were efficiently synthesized *in vitro* and bound efficiently to canonical, control sequences. (A-B) Ets (A) and Forkhead (B) proteins used in these studies were efficiently synthesized in coupled transcription-translation reactions *in vitro*. Proteins were labeled using [<sup>35</sup>S]-Methionine.

(C) EMSA demonstrating that all four Ets proteins used in the EMSA shown in Figs. 2B and 2F bound to their canonical binding sites (lanes 2, 4, 6, and 8). In each case, the protein was made alongside the radiolabeled protein seen in (A) and was the same batch of protein used for the EMSAs shown in Fig. 2. The canonical sites used in these assays are shown in Supplemental Material, Table S4.

(D) EMSA demonstrating that the six Forkhead proteins used in the EMSA shown in Figs. 2C and 2F bound to their consensus sites (lanes 2, 4, 6, 8, 10, and 12). In each case, the protein was made alongside the radiolabeled protein shown in (B) and was the same batch of protein used for the EMSAs shown in Fig. 2. The canonical sites used in these assays are shown in Supplemental Material, Table S4.



| GENE NAME | NO. OF HITS | FOX:ETS MOTIF                                               | LOCATION                                                                               | ANOTHER GENE WITHIN 10KB OF MOTIF |
|-----------|-------------|-------------------------------------------------------------|----------------------------------------------------------------------------------------|-----------------------------------|
| ANGPT1    | 0           |                                                             |                                                                                        |                                   |
| ANGPT2    | 0           |                                                             |                                                                                        |                                   |
| CALCRL    | 1           | TGATGTAACAGGAAGCT                                           | CHR2:188,138,544-188,138,560                                                           | N                                 |
| CD34      | 1           | TCCCCTAACAGGAAAGT                                           | CHR1:204,452,173-204,452,189                                                           | N                                 |
| CDH5      | 1           | AACAATAACAGGAAACC                                           | CHR16:64,957,955-64,957,971                                                            | N                                 |
| CTGF      | 0           |                                                             |                                                                                        |                                   |
| CTNNB1    | 0           |                                                             |                                                                                        |                                   |
| CYR61     | 0           |                                                             |                                                                                        |                                   |
| DSCR1     | 0           |                                                             |                                                                                        |                                   |
| EDG1      | 0           |                                                             |                                                                                        |                                   |
| EDG3      | 0           |                                                             |                                                                                        |                                   |
| EDN1      | 0           |                                                             |                                                                                        |                                   |
| EFEMP1    | 0           |                                                             |                                                                                        |                                   |
| EFNA1     | 0           |                                                             |                                                                                        |                                   |
| EFNB2     | 0           |                                                             |                                                                                        |                                   |
| ENG       | 1           | CAAGAAAACAGGAAGTG                                           | CHR9:127,686,977-127,686,993                                                           | N                                 |
| EPHB4     | 0           |                                                             |                                                                                        |                                   |
| ESM1      | 2           | AGAGAAAACAGGAATTA<br>AACAGAAAACAGGAAATA                     | CHR5:54,302,791-54,302,807<br>CHR5:54,302,814-54,302,830                               | N<br>N                            |
| F2R       | 0           |                                                             |                                                                                        |                                   |
| F2RL1     | 0           |                                                             |                                                                                        |                                   |
| F2RL3     | 0           |                                                             |                                                                                        |                                   |
| FLT1      | 0           |                                                             |                                                                                        |                                   |
| FOXC1     | 1           | TGGCACAACAGGAAAGC                                           | CHR6:1,564,936-1,564,952                                                               | Y                                 |
| FOXC2     | 0           |                                                             |                                                                                        |                                   |
| GATA2     | 0           |                                                             |                                                                                        |                                   |
| GJA1      | 1           | CAGAACAACAGGAAAGG                                           | CHR6:121,801,453-121,801,469                                                           | N                                 |
| GJA7      | 0           |                                                             |                                                                                        |                                   |
| ICAM1     | 0           |                                                             |                                                                                        |                                   |
| ICAM2     | 0           |                                                             |                                                                                        |                                   |
| IGFBP1    | 0           |                                                             |                                                                                        |                                   |
| IGFBP2    | 0           |                                                             |                                                                                        |                                   |
| IGFBP3    | 0           |                                                             |                                                                                        |                                   |
| IGFBP4    | 1           | AGGGAAAACAGGAAGGA                                           | CHR17:35,855,300-35,855,316                                                            | N                                 |
| IGFBP5    | 0           |                                                             |                                                                                        |                                   |
| IGFBP6    | 0           |                                                             |                                                                                        |                                   |
| ITGA5     | 0           |                                                             |                                                                                        |                                   |
| ITGB3     | 0           |                                                             |                                                                                        |                                   |
| KDR       | 3           | AACAACAACAGGAAGTG<br>TGTCATAACAGGAAGAA<br>CAGGAAAACAGGAACTC | CHR4:55,814,306-55,814,322<br>CHR4:55,828,453-55,828,469<br>CHR4:55,828,525-55,828,541 | N<br>N<br>N                       |
| KLF2      | 0           |                                                             |                                                                                        |                                   |
| KLF4      | 0           |                                                             |                                                                                        |                                   |
| LAMA4     | 1           | TAAAATAACAGGAAACC                                           | CHR6:112,643,014-112,643,030                                                           | N<br>N                            |

|          |   |                                        |                                                            |        |
|----------|---|----------------------------------------|------------------------------------------------------------|--------|
| LMO2     | 0 |                                        |                                                            |        |
| MCAM     | 0 |                                        |                                                            |        |
| MEF2C    | 1 | GGAGGAAACAGGAAAGA                      | CHR5:88,155,425-88,155,441                                 | N      |
| MFNG     | 0 |                                        |                                                            |        |
| MMRN1    | 1 | TACAGAAACAGGAAACC                      | CHR4:91,173,120-91,173,136                                 | N      |
| NFATC3   | 0 |                                        |                                                            |        |
| NFATC4   | 0 |                                        |                                                            |        |
| NOS3     | 0 |                                        |                                                            |        |
| NOTCH4   | 1 | AGAATAAACAGGAAAGG                      | CHR6:32,299,043-32,299,059                                 | N      |
| NR4A2    | 0 |                                        |                                                            |        |
| NRP1     | 1 | TCTGTAAACAGGAAAGA                      | CHR10:33,631,344-33,631,360                                | N      |
| PDGFRB   | 1 | AAGCACAACAGGAAATG                      | CHR5:149,497,296-149,497,312                               | N      |
| PECAM1   | 0 |                                        |                                                            |        |
| PODXL    | 0 |                                        |                                                            |        |
| PPP1R16B | 2 | GGACAAAACAGGAAGCT<br>GAAGCAAACAGGAAGCA | CHR20:36,874,399-36,874,415<br>CHR20:36,937,666-36,937,682 | N<br>N |
| PROCR    | 0 |                                        |                                                            |        |
| PTN      | 0 |                                        |                                                            |        |
| RHOJ     | 0 |                                        |                                                            |        |
| ROBO4    | 0 |                                        |                                                            |        |
| SELE     | 0 |                                        |                                                            |        |
| SERPINE1 | 0 |                                        |                                                            |        |
| SPARCL1  | 0 |                                        |                                                            |        |
| TAL1     | 1 | CACAATAACAGGATGTG                      | CHR1:47,389,774-47,389,790                                 | N      |
| THBS1    | 0 |                                        |                                                            |        |
| TIE1     | 0 |                                        |                                                            |        |
| VCAM1    | 0 |                                        |                                                            |        |
| VHL      | 0 |                                        |                                                            |        |
| VWF      | 0 |                                        |                                                            |        |

Table S1A: Endothelial gene set used in computational scan.

| GENE NAME | NO. OF HITS | FOX:ETS MOTIF | LOCATION | ANOTHER GENE WITHIN 10KB OF MOTIF |
|-----------|-------------|---------------|----------|-----------------------------------|
| AATF      | 0           |               |          |                                   |
| ABCG2     | 0           |               |          |                                   |
| ACTB      | 0           |               |          |                                   |
| ACTN4     | 0           |               |          |                                   |
| ADAR      | 0           |               |          |                                   |
| AFG3L2    | 0           |               |          |                                   |
| AGPAT1    | 0           |               |          |                                   |
| AHSA1     | 0           |               |          |                                   |
| AKR1A1    | 0           |               |          |                                   |
| ALDOA     | 0           |               |          |                                   |
| ALDOC     | 0           |               |          |                                   |
| ANAPC5    | 0           |               |          |                                   |
| ANP32B    | 0           |               |          |                                   |
| ANXA2     | 0           |               |          |                                   |
| ANXA6     | 0           |               |          |                                   |
| AP2M1     | 0           |               |          |                                   |
| APLP2     | 0           |               |          |                                   |
| APOBEC3C  | 0           |               |          |                                   |
| ARF1      | 0           |               |          |                                   |
| ARF4      | 0           |               |          |                                   |
| ARF5      | 0           |               |          |                                   |
| ARHGAP1   | 0           |               |          |                                   |
| ARHGDIA   | 0           |               |          |                                   |
| ARHGEF18  | 0           |               |          |                                   |
| ARL2      | 0           |               |          |                                   |
| ARMET     | 0           |               |          |                                   |
| ARPC2     | 0           |               |          |                                   |
| ARPC3     | 0           |               |          |                                   |
| ARPC4     | 0           |               |          |                                   |
| ATP5A1    | 0           |               |          |                                   |
| ATP5G1    | 0           |               |          |                                   |
| ATP5G3    | 0           |               |          |                                   |
| ATP5H     | 0           |               |          |                                   |
| ATP5I     | 0           |               |          |                                   |
| ATP5J2    | 0           |               |          |                                   |
| ATP5O     | 0           |               |          |                                   |
| BAT1      | 0           |               |          |                                   |
| BLOC1S1   | 0           |               |          |                                   |
| BRMS1     | 0           |               |          |                                   |
| BTBD2     | 0           |               |          |                                   |
| BTF3      | 0           |               |          |                                   |
| BUD31     | 0           |               |          |                                   |
| C14ORF2   | 0           |               |          |                                   |
| C21ORF33  | 0           |               |          |                                   |
| C9ORF16   | 0           |               |          |                                   |
| CALM1     | 0           |               |          |                                   |
| CALM2     | 0           |               |          |                                   |
| CANX      | 0           |               |          |                                   |
| CAPNS1    | 0           |               |          |                                   |
| CAPZB     | 0           |               |          |                                   |
| CCBP2     | 0           |               |          |                                   |
| CCT3      | 0           |               |          |                                   |
| CCT7      | 0           |               |          |                                   |
| CDC2L2    | 0           |               |          |                                   |
| CENPB     | 0           |               |          |                                   |

|           |   |                   |                              |   |
|-----------|---|-------------------|------------------------------|---|
| CFL1      | 0 |                   |                              |   |
| CGB7      | 0 |                   |                              |   |
| CHD4      | 0 |                   |                              |   |
| CHIT1     | 0 |                   |                              |   |
| CIZ1      | 0 |                   |                              |   |
| CKAP1     | 0 |                   |                              |   |
| CLSTN1    | 0 |                   |                              |   |
| CLTA      | 0 |                   |                              |   |
| CNTN1     | 0 |                   |                              |   |
| COBRA1    | 0 |                   |                              |   |
| COMMD4    | 0 |                   |                              |   |
| COPS6     | 0 |                   |                              |   |
| COX4I1    | 0 |                   |                              |   |
| COX5A     | 0 |                   |                              |   |
| COX5B     | 0 |                   |                              |   |
| COX6A1    | 0 |                   |                              |   |
| COX7A2L   | 0 |                   |                              |   |
| COX7C     | 0 |                   |                              |   |
| CPNE1     | 0 |                   |                              |   |
| CPNE6     | 0 |                   |                              |   |
| CREB3     | 0 |                   |                              |   |
| CSK       | 1 | GCAGAAACAGGAAGCC  | CHR15:72,856,902-72,856,918  | N |
| CSNK1E    | 0 |                   |                              |   |
| CSNK2B    | 0 |                   |                              |   |
| CSTB      | 0 |                   |                              |   |
| CTBP1     | 0 |                   |                              |   |
| CXYORF3   | 0 |                   |                              |   |
| CYC1      | 0 |                   |                              |   |
| DAD1      | 0 |                   |                              |   |
| DAP       | 0 |                   |                              |   |
| DAZAP2    | 0 |                   |                              |   |
| DDOST     | 0 |                   |                              |   |
| DIAPH1    | 1 | ACCACAAACAGGAAATG | CHR5:140,918,168-140,918,184 | N |
| DKK4      | 0 |                   |                              |   |
| DNPEP     | 0 |                   |                              |   |
| DRAP1     | 0 |                   |                              |   |
| DULLARD   | 0 |                   |                              |   |
| DUOXA1    | 0 |                   |                              |   |
| DYNLL1    | 0 |                   |                              |   |
| EIF3S2    | 0 |                   |                              |   |
| EIF3S4    | 0 |                   |                              |   |
| EIF3S5    | 0 |                   |                              |   |
| EIF3S8    | 0 |                   |                              |   |
| EIF4A2    | 0 |                   |                              |   |
| EIF4G2    | 0 |                   |                              |   |
| ENTPD6    | 0 |                   |                              |   |
| ERP29     | 0 |                   |                              |   |
| EXTL3     | 0 |                   |                              |   |
| FAU       | 0 |                   |                              |   |
| FBXO7     | 0 |                   |                              |   |
| FCER2     | 0 |                   |                              |   |
| FEZ1      | 0 |                   |                              |   |
| FOLR1     | 0 |                   |                              |   |
| FTH1      | 0 |                   |                              |   |
| GABARAP   | 0 |                   |                              |   |
| GABARAPL2 | 0 |                   |                              |   |
| GANAB     | 0 |                   |                              |   |
| GAS1      | 0 |                   |                              |   |
| GDI1      | 0 |                   |                              |   |
| GDI2      | 0 |                   |                              |   |
| GGTLA1    | 0 |                   |                              |   |



|           |   |                   |                            |   |
|-----------|---|-------------------|----------------------------|---|
| GM2A      | 0 |                   |                            |   |
| GNAI2     | 1 | CAGAAAAACAGGAAGGG | CHR3:50,267,523-50,267,539 | N |
| GNAS      | 0 |                   |                            |   |
| GNB2      | 0 |                   |                            |   |
| GPAA1     | 0 |                   |                            |   |
| GPI       | 0 |                   |                            |   |
| GRIK5     | 0 |                   |                            |   |
| GRM4      | 0 |                   |                            |   |
| GSK3A     | 0 |                   |                            |   |
| GUK1      | 0 |                   |                            |   |
| H2AFY     | 0 |                   |                            |   |
| H3F3A     | 0 |                   |                            |   |
| H6PD      | 0 |                   |                            |   |
| HADHA     | 0 |                   |                            |   |
| HADHB     | 0 |                   |                            |   |
| HAX1      | 0 |                   |                            |   |
| HIST1H2BC | 0 |                   |                            |   |
| HLA-C     | 0 |                   |                            |   |
| HNRPD     | 0 |                   |                            |   |
| HNRPH1    | 0 |                   |                            |   |
| HPCAL1    | 0 |                   |                            |   |
| HSBP1     | 0 |                   |                            |   |
| HSP90AB1  | 0 |                   |                            |   |
| HYOU1     | 0 |                   |                            |   |
| IDH3B     | 0 |                   |                            |   |
| IER2      | 0 |                   |                            |   |
| IFITM1    | 0 |                   |                            |   |
| ILK       | 0 |                   |                            |   |
| IMPDH2    | 0 |                   |                            |   |
| JTB       | 0 |                   |                            |   |
| KDELRL1   | 0 |                   |                            |   |
| KIF1C     | 0 |                   |                            |   |
| KIFC3     | 0 |                   |                            |   |
| LASP1     | 0 |                   |                            |   |
| LDHA      | 0 |                   |                            |   |
| LDHB      | 0 |                   |                            |   |
| LYPLA2    | 0 |                   |                            |   |
| MAP4      | 0 |                   |                            |   |
| MAPK8IP1  | 0 |                   |                            |   |
| MC2R      | 0 |                   |                            |   |
| MCM3AP    | 0 |                   |                            |   |
| MDH1      | 0 |                   |                            |   |
| MEA1      | 0 |                   |                            |   |
| MFN2      | 0 |                   |                            |   |
| MLF2      | 0 |                   |                            |   |
| MRLC2     | 0 |                   |                            |   |
| MRPL23    | 0 |                   |                            |   |
| MRPL9     | 0 |                   |                            |   |
| MRPS12    | 0 |                   |                            |   |
| MSN       | 0 |                   |                            |   |
| MTX1      | 0 |                   |                            |   |
| MVK       | 0 |                   |                            |   |
| MYL6      | 0 |                   |                            |   |
| NDUFA1    | 0 |                   |                            |   |
| NDUFA2    | 0 |                   |                            |   |
| NDUFA7    | 0 |                   |                            |   |
| NDUFB7    | 0 |                   |                            |   |
| NDUFC1    | 0 |                   |                            |   |
| NDUFS5    | 0 |                   |                            |   |
| NONO      | 0 |                   |                            |   |
| NUDT3     | 0 |                   |                            |   |

|         |   |                   |                              |   |
|---------|---|-------------------|------------------------------|---|
| NXF1    | 0 |                   |                              |   |
| ODC1    | 0 |                   |                              |   |
| PABPC1  | 0 |                   |                              |   |
| PABPN1  | 0 |                   |                              |   |
| PAK4    | 0 |                   |                              |   |
| PAX8    | 0 |                   |                              |   |
| PCGF2   | 0 |                   |                              |   |
| PDAP1   | 0 |                   |                              |   |
| PFDN1   | 1 | CTGCACAACAGGAAAAG | CHR5:139,653,654-139,653,670 | N |
| PFDN5   | 0 |                   |                              |   |
| PGD     | 0 |                   |                              |   |
| PGK1    | 0 |                   |                              |   |
| PHF1    | 0 |                   |                              |   |
| PHGDH   | 1 |                   |                              |   |
| PITPNM1 | 0 |                   |                              |   |
| PKM2    | 0 |                   |                              |   |
| PLSCR3  | 0 |                   |                              |   |
| POLR2F  | 0 |                   |                              |   |
| PPP1R11 | 0 |                   |                              |   |
| PPP2CB  | 0 |                   |                              |   |
| PPP2R1A | 0 |                   |                              |   |
| PRDX1   | 0 |                   |                              |   |
| PRKAG1  | 0 |                   |                              |   |
| PRPF8   | 0 |                   |                              |   |
| PRPH    | 0 |                   |                              |   |
| PSMB1   | 0 |                   |                              |   |
| PSMB2   | 0 |                   |                              |   |
| PSMB4   | 0 |                   |                              |   |
| PSMB7   | 0 |                   |                              |   |
| PSMD11  | 0 |                   |                              |   |
| PSMD8   | 0 |                   |                              |   |
| PTBP1   | 0 |                   |                              |   |
| PTDSS1  | 0 |                   |                              |   |
| PTTG1IP | 0 |                   |                              |   |
| RAB1A   | 0 |                   |                              |   |
| RAB8A   | 0 |                   |                              |   |
| RABAC1  | 0 |                   |                              |   |
| RAD23A  | 0 |                   |                              |   |
| RAD9A   | 0 |                   |                              |   |
| RAN     | 0 |                   |                              |   |
| RBM8A   | 0 |                   |                              |   |
| RBPMS   | 0 |                   |                              |   |
| RERE    | 1 | GTTTATAACAGGAAGTG | CHR1:8,817,287-8,817,303     | N |
| RNPS1   | 0 |                   |                              |   |
| RPA2    | 0 |                   |                              |   |
| RPL10   | 0 |                   |                              |   |
| RPL10A  | 0 |                   |                              |   |
| RPL11   | 0 |                   |                              |   |
| RPL13   | 0 |                   |                              |   |
| RPL13A  | 0 |                   |                              |   |
| RPL14   | 0 |                   |                              |   |
| RPL15   | 0 |                   |                              |   |
| RPL17   | 0 |                   |                              |   |
| RPL18   | 0 |                   |                              |   |
| RPL19   | 0 |                   |                              |   |
| RPL27   | 0 |                   |                              |   |
| RPL29   | 0 |                   |                              |   |
| RPL3    | 0 |                   |                              |   |
| RPL32   | 0 |                   |                              |   |
| RPL34   | 0 |                   |                              |   |
| RPL35   | 0 |                   |                              |   |

|          |   |  |  |
|----------|---|--|--|
| RPL36AL  | 0 |  |  |
| RPL37    | 0 |  |  |
| RPL38    | 0 |  |  |
| RPL5     | 0 |  |  |
| RPL8     | 0 |  |  |
| RPLP1    | 0 |  |  |
| RPLP2    | 0 |  |  |
| RPN1     | 0 |  |  |
| RPS10    | 0 |  |  |
| RPS11    | 0 |  |  |
| RPS13    | 0 |  |  |
| RPS14    | 0 |  |  |
| RPS15    | 0 |  |  |
| RPS16    | 0 |  |  |
| RPS18    | 0 |  |  |
| RPS19    | 0 |  |  |
| RPS2     | 0 |  |  |
| RPS24    | 0 |  |  |
| RPS25    | 0 |  |  |
| RPS27A   | 0 |  |  |
| RPS5     | 0 |  |  |
| RPS6KB2  | 0 |  |  |
| RPS9     | 0 |  |  |
| RRBP1    | 0 |  |  |
| RUVBL2   | 0 |  |  |
| SAFB     | 0 |  |  |
| SAP18    | 0 |  |  |
| SCAMP3   | 0 |  |  |
| SDHA     | 0 |  |  |
| SEC61B   | 0 |  |  |
| SEC61G   | 0 |  |  |
| SFRS9    | 0 |  |  |
| SGSH     | 0 |  |  |
| SIAHBP1  | 0 |  |  |
| SLC25A1  | 0 |  |  |
| SLC25A11 | 0 |  |  |
| SLC25A3  | 0 |  |  |
| SLC6A7   | 0 |  |  |
| SLC6A8   | 0 |  |  |
| SLC9A3R2 | 0 |  |  |
| SNRP70   | 0 |  |  |
| SNRPA    | 0 |  |  |
| SNRPB    | 0 |  |  |
| SNRPG    | 0 |  |  |
| SNX3     | 0 |  |  |
| SPAG7    | 0 |  |  |
| SRM      | 0 |  |  |
| SRRM1    | 0 |  |  |
| SSR2     | 0 |  |  |
| SSTR5    | 0 |  |  |
| STARD7   | 0 |  |  |
| STK19    | 0 |  |  |
| STK24    | 0 |  |  |
| SUMO2    | 0 |  |  |
| SUMO3    | 0 |  |  |
| SYNGR2   | 0 |  |  |
| TADA3L   | 0 |  |  |
| TAGLN    | 0 |  |  |
| TALDO1   | 0 |  |  |
| TAPBP    | 0 |  |  |
| TCEB2    | 0 |  |  |

|         |   |  |  |
|---------|---|--|--|
| TCOF1   | 0 |  |  |
| TEGT    | 0 |  |  |
| TERF2IP | 0 |  |  |
| TETTRAN | 0 |  |  |
| TEX261  | 0 |  |  |
| TKT     | 0 |  |  |
| TLN1    | 0 |  |  |
| TMED2   | 0 |  |  |
| TMEM4   | 0 |  |  |
| TMSB10  | 0 |  |  |
| TPMT    | 0 |  |  |
| TRAP1   | 0 |  |  |
| TSFM    | 0 |  |  |
| TSTA3   | 0 |  |  |
| TTC1    | 0 |  |  |
| TUBB4   | 0 |  |  |
| TUBGCP2 | 0 |  |  |
| TUT1    | 0 |  |  |
| UBE1    | 0 |  |  |
| UBE2D2  | 0 |  |  |
| UBE2I   | 0 |  |  |
| UBE2M   | 0 |  |  |
| UQCR    | 0 |  |  |
| UQCRC1  | 0 |  |  |
| UQCRFS1 | 0 |  |  |
| UQCRH   | 0 |  |  |
| USP11   | 0 |  |  |
| VIL2    | 0 |  |  |
| WDR1    | 0 |  |  |
| YARS    | 0 |  |  |
| YWHAH   | 0 |  |  |
| YWHAQ   | 0 |  |  |
| YWHAZ   | 0 |  |  |
| ZFPL1   | 0 |  |  |
| ZNF384  | 0 |  |  |
| ZNF91   | 0 |  |  |

Table S1B: Housekeeping gene set used in computational scan.

| GENE NAME | NO. OF HITS | FOX:ETS MOTIF | LOCATION | ANOTHER GENE WITHIN 10KB OF MOTIF |
|-----------|-------------|---------------|----------|-----------------------------------|
| ALDOA     | 0           |               |          |                                   |
| ATP2A1    | 0           |               |          |                                   |
| ATP2A1    | 0           |               |          |                                   |
| ATP2A2    | 0           |               |          |                                   |
| CA3       | 0           |               |          |                                   |
| CACNA1S   | 0           |               |          |                                   |
| CACNG1    | 0           |               |          |                                   |
| CASQ1     | 0           |               |          |                                   |
| CFL2      | 0           |               |          |                                   |
| CKM       | 0           |               |          |                                   |
| CMYA5     | 0           |               |          |                                   |
| COX6A2    | 0           |               |          |                                   |
| CPT1B     | 0           |               |          |                                   |
| DES       | 0           |               |          |                                   |
| DUSP13    | 0           |               |          |                                   |
| DYSF      | 0           |               |          |                                   |
| DYSFIP1   | 0           |               |          |                                   |
| EEF1A2    | 0           |               |          |                                   |
| ENO3      | 0           |               |          |                                   |
| FLNC      | 0           |               |          |                                   |
| GAA       | 0           |               |          |                                   |
| GANAB     | 0           |               |          |                                   |
| HFE2      | 0           |               |          |                                   |
| KCNA7     | 0           |               |          |                                   |
| LMCD1     | 0           |               |          |                                   |
| MUSTN1    | 0           |               |          |                                   |
| MYBPC1    | 0           |               |          |                                   |
| MYBPC2    | 0           |               |          |                                   |
| MYBPH     | 0           |               |          |                                   |
| MYF5      | 0           |               |          |                                   |
| MYF6      | 0           |               |          |                                   |
| MYH1      | 0           |               |          |                                   |
| MYH2      | 0           |               |          |                                   |
| MYH4      | 0           |               |          |                                   |
| MYL1      | 0           |               |          |                                   |
| MYL6B     | 0           |               |          |                                   |
| MYLK2     | 0           |               |          |                                   |
| MYLPF     | 0           |               |          |                                   |
| MYO18B    | 0           |               |          |                                   |
| MYOG      | 0           |               |          |                                   |
| MYOM2     | 0           |               |          |                                   |
| MYOT      | 0           |               |          |                                   |
| MYOZ1     | 0           |               |          |                                   |
| MYOZ2     | 0           |               |          |                                   |
| NEB       | 0           |               |          |                                   |
| PDK4      | 0           |               |          |                                   |
| PFKM      | 0           |               |          |                                   |
| PGAM2     | 0           |               |          |                                   |
| PHKA1     | 0           |               |          |                                   |
| PRKAA2    | 0           |               |          |                                   |
| PRRX1     | 0           |               |          |                                   |
| PVALB     | 0           |               |          |                                   |
| PYGM      | 0           |               |          |                                   |
| PYGM      | 0           |               |          |                                   |
| RYR1      | 0           |               |          |                                   |

|        |   |  |  |  |
|--------|---|--|--|--|
| SGCA   | 0 |  |  |  |
| SGCG   | 0 |  |  |  |
| SIX1   | 0 |  |  |  |
| SMPX   | 0 |  |  |  |
| SMYD1  | 0 |  |  |  |
| SRL    | 0 |  |  |  |
| TCAP   | 0 |  |  |  |
| TMOD4  | 0 |  |  |  |
| TNNC1  | 0 |  |  |  |
| TNNC2  | 0 |  |  |  |
| TNNI1  | 0 |  |  |  |
| TNNI2  | 0 |  |  |  |
| TNNT3  | 0 |  |  |  |
| TPM2   | 0 |  |  |  |
| TPM3   | 0 |  |  |  |
| TRDN   | 0 |  |  |  |
| TTN    | 0 |  |  |  |
| UGP2   | 0 |  |  |  |
| UNC45B | 0 |  |  |  |
| ZNF185 | 0 |  |  |  |

Table S1C: Skeletal muscle gene set used in computational scan.

| Gene name | FOX:ETS motif (human sequence) | Location (human 2004 assembly) | Bind in EMSA | Conservation   | Endothelial specific enhancer | Endothelial/Express/Tg |
|-----------|--------------------------------|--------------------------------|--------------|----------------|-------------------------------|------------------------|
| FLT4      | TAGGAAAACAGGAAGTG              | chr5:179983112-179983128       | yes          | Human: Xenopus | Yes                           | 4/4/7                  |
| FOXP1     | AGTCCAAACAGGAAAGG              | chr3:71576377-71576393         | yes          | Human: Fugu    | Yes                           | 4/3/6                  |
| NRP1      | TCTGTAAACAGGAAAGA              | chr10:33631344-33631360        | yes          | Human: chicken | Yes                           | 7/7/7                  |
| ECE1      | TAGCTAAACAGGAAGGG              | chr1:21351860-21351876         | Yes          | Human: opossum | Yes                           | 5/5/8                  |
| PDGFRB    | AAGCACAACAGGAAATG              | chr5:149497296-149497312       | yes          | Human: opossum | Yes                           | 4/4/7                  |
| FGFR2     | GAGAAAACAGGATATT               | chr10:123346296-123346312      | Yes          | Human: chicken | No                            | 0/1/6                  |
| NR4A3     | TGATAAAACAGGAAAAC              | chr9:99656354-99656364         | Yes          | Human: chicken | No                            | 0/5/8                  |
| EFNB1     | CAGCCAAACAGGAAGAT              | chr23:67854018-67854034        | Yes          | Human: chicken | No                            | 0/3/5                  |
| WNT2B     | TTCTGAAACAGGAAAAC              | chr1:112765333-112765349       | Yes          | Human: chicken | ND                            |                        |
| STAT5B    | AATACAAACAGGAAGCA              | chr17:37678267-37678283        | Yes          | Human: Xenopus | ND                            |                        |
| ESM1      | AACAGAAACAGGAAATA              | chr5:54302814-54302830         | No           | Human: chicken | ND                            |                        |
| FOXO1A    | GTGAAAACAGGAATTT               | chr13:40036590-40036606        | No           | Human: chicken | ND                            |                        |
| RAC1      | CAGAGAAACAGGAAATG              | chr7:6187392-6187408           | No           | Human: chicken | ND                            |                        |

Table S2. Putative enhancers identified in genome-wide scan for FOX:ETS motifs.

| Primer name                         | Primer sequence                                          |
|-------------------------------------|----------------------------------------------------------|
| <i>mef2c</i> -F10 (+)               | catctccttttcccgggggtttcc                                 |
| <i>mef2c</i> -F10 (-)               | ccttctcccggggcccatctctgt                                 |
| <i>mef2c</i> -F10 •44 (+)           | gttactgttagctcagcagggaat                                 |
| <i>mef2c</i> -F10 •44 (-)           | gctaacagtaacttcttccctccac                                |
| <i>mef2c</i> -F10 44bp (+)          | tccgagcaggaagcacatttgtctacgctttcctgtcataac<br>aggaagaga  |
| <i>mef2c</i> -F10 44bp (-)          | agcttctcttctctgttatgacaggaaagcgtagacaaatgt<br>gcttccctgc |
| <i>mef2c</i> -F10 mutFOX:ETS (+)    | tgtcata <b>cttaga</b> agagagtaact                        |
| <i>mef2c</i> -F10 mutFOX:ETS (-)    | agttactctctt <b>cttaga</b> tatgaca                       |
| VE-CADHERIN 377bp (+)               | aggaggggttactagtgatgctgca                                |
| VE-CADHERIN 377bp (-)               | agggctgagcactagtggagctctgtgg                             |
| VE-CADHERIN 3.5kb (+)               | agtgccctggga <b>actag</b> taagagggagt                    |
| VE-CADHERIN 3.5kb (-)               | ttcc <b>actag</b> tctgcctgtccgtccagg                     |
| VE-CADHERIN 3.5kb mutFOX:ETS (+)    | aagg <b>cacc</b> ata <b>tgagg</b> caaccatcccaggg         |
| VE-CADHERIN 3.5kb mutFOX:ETS (-)    | ggttgcc <b>cat</b> at <b>ggtg</b> cccttctgtgagggc        |
| Flk1 enhancer (+)                   | acaagaaatgtcagtgggccc                                    |
| Flk1 enhancer (-)                   | gggattgactttgccccagt                                     |
| NOTCH4 enhancer (+)                 | cacactcccggggcaggtcccttgtc                               |
| NOTCH4 enhancer (-)                 | ggctcaatgctcggcctttccgg                                  |
| Tie2 promoter (+)                   | tgtcaggggtacccaaatgcaccccagag                            |
| Tie2 promoter (-)                   | tccacactcgagcatgagtccttgggaa                             |
| Mef2c ChIP PCR (+)                  | tattggagttgggagctaaa                                     |
| Mef2c ChIP PCR (-)                  | ctacattccctgctgagcta                                     |
| Ve-cadherin ChIP PCR (+)            | caccgcagggcctgcctat                                      |
| Ve-cadherin ChIP PCR (-)            | tgtcagccgaccgtctttgga                                    |
| Flk1 ChIP PCR (+)                   | aagaccttgaagttggcaac                                     |
| Flk1 ChIP PCR (-)                   | gggattgactttgccccagt                                     |
| Tal1 ChIP PCR (+)                   | ccagctcctacttaagctct                                     |
| Tal1 ChIP PCR (-)                   | ctgctatcggcacagcagt                                      |
| Notch4 ChIP PCR (+)                 | caggccttccattcatagct                                     |
| Notch4 ChIP PCR (-)                 | ttaggtgtctcagccattca                                     |
| Tie2 ChIP PCR (+)                   | caagccctgctgataccaagt                                    |
| Tie2 ChIP PCR (-)                   | caaggagaaacaccacagaa                                     |
| FLT4 putative enhancer (+)          | acaggaccgggtagtggggcaga                                  |
| FLT4 putative enhancer (-)          | aggagaccggggccattactgccat                                |
| PDGFR $\beta$ putative enhancer (+) | agtcaaaagcttccacgtcccaagcct                              |
| PDGFR $\beta$ putative enhancer (-) | gagagcaagcttccccattcagt                                  |
| ECE1 putative enhancer (+)          | cataatcccggggcaaaaacacgcga                               |
| ECE1 putative enhancer (-)          | tgactgaccggggccagacatcacc                                |
| NRP1 putative enhancer (+)          | tcaggaccggggtcatgggcatgcat                               |
| NRP1 putative enhancer (-)          | agatttcccgggttcatactggct                                 |
| FOXP1 putative enhancer (+)         | ctctccaagcttctcaacagtcac                                 |
| FOXP1 putative enhancer (-)         | ctccagaagcttttgctattgctggt                               |
| FGFR2 putative enhancer (+)         | cctccaaaagcttagaccatctcttcg                              |
| FGFR2 putative enhancer (-)         | aggaccaagcttctgcggttggagt                                |
| NR4A3 putative enhancer (+)         | atthttggcgggttatgctattggt                                |
| NR4A3 putative enhancer (-)         | gatagtcccgggctcactttatgatt                               |
| EFNB1 putative enhancer (+)         | ctagaaccggggtcttctgtcttcaa                               |
| EFNB1 putative enhancer (-)         | gagagtcccgggcttgaaatccca                                 |
| Foxc1a morpholino                   | cctgcatgactgctctccaaaacgg                                |
| Foxc1b morpholino                   | gcatcgtaccctttcttcggtaca                                 |
| Flk1 qPCR (+)                       | ggagttcttggcttcaagaa                                     |
| Flk1 qPCR (-)                       | ctgtcaaagatgggttctgg                                     |
| Pecam qPCR (+)                      | atgagtgtgacgtgttctgtg                                    |



|                |                       |
|----------------|-----------------------|
| Pecam qPCR (-) | gacagccatgcaatgtctatg |
|----------------|-----------------------|

Table S3: Oligonucleotide primers for cloning, mutagenesis, morpholino knockdown, qPCR, and ChIP.

| Oligo name                          | Oligo sequence                                     |
|-------------------------------------|----------------------------------------------------|
| <i>Mef2c</i> -F10-44 FOX-NC (+)     | ggaagttactctcttcctggtatgacaggaaagcgtagaca          |
| <i>Mef2c</i> -F10-44 mut FOX-NC (+) | ggaagttactctcttc <b>taga</b> tatgacaggaaagcgtagaca |
| <i>Mef2c</i> -F10 FOX:ETS (+)       | aagttactctcttcctggtatgacagg                        |
| <i>Mef2c</i> -F10-44 ETS-A (+)      | ggagttactctcttcctggtatgaca                         |
| <i>Mef2c</i> -F10-44 mutETSA (+)    | ggagttactctcttc <b>taga</b> tatgaca                |
| Flk1 FOX:ETS (+)                    | ggctgcccattcttcctggtatgacagagccttgtaa              |
| Flk1 mutFOX:ETS (+)                 | ggctgcccattcttc <b>acggcc</b> gacagagccttgtaa      |
| Tal1 FOX:ETS (+)                    | ggcgaacggatcacatcctggtattgtgtggaaagaaagaa          |
| Tal1 mutFOX:ETS (+)                 | ggcgaacggatcacatcct <b>agct</b> cgtgtggaaagaaagaa  |
| CDH5 FOX:ETS (+)                    | ggcctcgggatggtttcctggtattgttcctttgtgagctg          |
| CDH5 mutFOX:ETS (+)                 | ggcctcgggatggtttcct <b>agctc</b> ggttcctttgtgagctg |
| NOTCH4 FOX:ETS (+)                  | ggccctacccccctttcctggttattctctggcctc               |
| NOTCH4 mutFOX:ETS (+)               | ggccctaccccccttt <b>ccacca</b> tattctctggcctc      |
| Tek FOX:ETS (+)                     | ggtgcaaaggaaacaggaaaaaggaactt                      |
| Tek mutFOX:ETS (+)                  | ggtgcaaaggaa <b>tctag</b> aaaaaggaactt             |
| FoxC1/2 control site (+)            | gggaggagcagcctggttggtttgcccagatctgtgc              |
| FoxF1/FoxA2 control site (+)        | ggcttgacgtaattggtttttacgagcgt                      |
| FoxH1 control site (+)              | gggattagaagatgtggattgcgtccgg                       |
| FoxO1 control site (+)              | gggacgttttaggttggtttattcct                         |
| Ets1/ER71 control site (+)          | ggaaccaagcttgagtaccggaagagtacaccg                  |
| Erg control site (+)                | gggagagtgcaccggaagtcagttaa                         |
| Elf1 control site (+)               | taaaccggaagtgtagtacatctggatcg                      |

Table S4: Sense strand sequence of oligonucleotide probes used in EMSA. For the mutant FOX:ETS oligonucleotides for *Mef2c*, *Flk1*, *Tal1*, *CDH5*, *NOTCH4*, and *Tek*, the mutations were confirmed experimentally to disrupt binding in EMSA by FoxC2, Etv2, and the Ets1 DNA binding domain.
